# Supplementary material for: Oral health of elite athletes and association with performance: a systematic review
Source: PubMed Central journal article supplement — Br J Sports Med. 2014 Nov 11;49(1):14–9. doi: 10.1136/bjsports-2014-093617 (PMC4316843; doi:10.1136/bjsports-2014-093617), 2014-11-11
Supplement: bjsports-2014-093617-s1.pdf [file bjsports-2014-093617-s1.pdf]

Table S1 Characteristics of included studies

Table S2. Methodological quality of the included studies

Table S1 Characteristics of included studies

| <b>Author/year</b>              | <b>Country</b> | <b>Sport</b>   | <b>Number of participants</b>           | <b>Outcome measure</b>                                                             |
|---------------------------------|----------------|----------------|-----------------------------------------|------------------------------------------------------------------------------------|
| Andrade et al.[7]<br>2013       | Brazil         | Olympic sports | 120                                     | Dental trauma                                                                      |
| Azodo et al.[8]<br>2011         | Nigeria        | Basketball     | 156                                     | Oral injury                                                                        |
| Beis et al.[9]<br>2001          | Greece         | Taekwondo      | 2739                                    | Mouth injury                                                                       |
| Bolhuis et al.[10]<br>1987      | USA            | Field hockey   | 279                                     | Dental and facial injury                                                           |
| Bryant et al.[11]<br>2011       | New Zealand    | Triathletes    | 31 (only 10 had a clinical examination) | Caries (DMFT) and caries risk, periodontal disease (CPITN), and tooth surface Loss |
| Chapman and Nasser[12]<br>1993  | Australia      | Rugby          | 102                                     | Oro-facial injury                                                                  |
| Davies et al.[13]<br>1977       | England        | Rugby          | 281                                     | Dental injury                                                                      |
| De Cardenas[14]<br>1977         | Cuba           | Athletes       | 209                                     | Oral Health                                                                        |
| De Sant'Anna et al.[15]<br>2004 | Brazil         | Football       | 18                                      | Caries (DMFT)                                                                      |
| Deitch et al.[16]<br>2006       | USA            | Basketball     | Male NBA players = 702<br>Women's NBA   | Tooth fracture                                                                     |

|                               |           |                    |                                           |                                                                                                                              |
|-------------------------------|-----------|--------------------|-------------------------------------------|------------------------------------------------------------------------------------------------------------------------------|
|                               |           |                    | players = 443                             |                                                                                                                              |
| Dorney[17]<br>1999            | Australia | Rugby              | 25                                        | Dental Injury                                                                                                                |
| Faye et al.[18]<br>2008       | Senegal   | Wrestling          | 125                                       | Oral Injury                                                                                                                  |
| Forrest[19]<br>1969           | Mexico    | All Olympic sports | 350                                       | Caries (DMFT), Oral hygiene, periodontal disease (4 point score 0=health, 3=established disease)                             |
| Frontera et al.[20]<br>2011   | Brazil    | Basketball         | 388                                       | Orofacial injury                                                                                                             |
| Gay-Escoda et al.[21]<br>2011 | Spain     | Football           | 30                                        | Caries (DMFT), plaque (Quigley Hein), Gingivitis (Loe and Silness), periodontal disease (probing depth)<br><br>Dental Injury |
| Kay et al.[22]<br>1990        | Scotland  | Rugby              | 63                                        | Oro-facial and dental injury                                                                                                 |
| Kuzuhara et al.[23]<br>2009   | Japan     | Ice hockey         | 94                                        | Tooth lesions                                                                                                                |
| Lundell[24]<br>1997           | USA       | Biathlon           | 31                                        | Caries (Unclear), periodontal disease (unclear), temporomandibular joint disorders                                           |
| Ma[25]<br>2008                | China     | Basketball         | Professional = 77                         | Dental injury                                                                                                                |
| McLatchie[26]<br>1976         | Scotland  | Karate             | 295 Contests included, number of athletes | Injuries to face, head and neck                                                                                              |

|                                      |         |                    |                                  |                                                                                                                                                             |
|--------------------------------------|---------|--------------------|----------------------------------|-------------------------------------------------------------------------------------------------------------------------------------------------------------|
|                                      |         |                    | unclear                          |                                                                                                                                                             |
| Milosevic et al.[27]<br>1997         | England | Swimming, Cycling. | Swimmers = 25<br>Cyclists = 20   | Caries (DMFS), tooth surface loss (Smith and Knight)                                                                                                        |
| Muller-Bolla et al.[28]<br>2003      | France  | Rugby              | 1140                             | Orofacial trauma                                                                                                                                            |
| Needleman et al.[1]<br>2013          | UK      | All Olympic sports | 278                              | Dental and orofacial trauma, caries, erosion (Basic wear index), periodontal disease (BPE), mucosal health, athlete-reported impact on QoL and performance. |
| Persson and Kiliaridis[29]<br>1994   | Sweden  | Wrestling          | Wrestlers = 26<br>Control = 26   | Dental injury, caries (DFT), Temporomandibular joint disorders                                                                                              |
| Pettersson and Lorentzon[30]<br>1993 | Sweden  | Ice hockey         | 376                              | Tooth lesion                                                                                                                                                |
| Randell[31]<br>1988                  | USA     | Football           | 34                               | Dental injury, caries, gingivitis                                                                                                                           |
| Sane et al.[32]<br>1987              | Finland | Ice hockey         | Not stated                       | Maxillofacial and dental injury                                                                                                                             |
| Sharma et al.[33]<br>2012            | India   | Olympic sports     | 342                              | Treatment provided                                                                                                                                          |
| Soler Badia et al.[34]<br>1994       | Spain   | Olympic Sports     | 266 (478 including non-athletes) | Treatment provided<br>Athlete-reported impact on performance                                                                                                |
| Stokes and                           | New     | Rugby              | 21                               | Dental trauma                                                                                                                                               |

|                                  |         |                |                                                    |                        |
|----------------------------------|---------|----------------|----------------------------------------------------|------------------------|
| Chapman[35]<br>1991              | Zealand |                |                                                    |                        |
| Stuart et al.[36]<br>2002        | USA     | Ice hockey     | 282 players (70 sustained injury)                  | Mouth and teeth injury |
| Szekely[37]<br>1996              | Hungary | Olympic sports | 197                                                | Caries/dental disease  |
| Vouglouklakis et al.[38]<br>2008 | Greece  | Olympic sports | 658, includes data from athletes and non-athletes  | Treatment provided     |
| Yang et al.[39]<br>2011          | China   | Olympic Sports | Athletes = 795<br>Coaches = 483<br>Volunteers = 99 | Treatment provided     |

**Table S2.** Methodological quality of the included studies

| <b>Author/year</b>              | <b>Study design</b>       | <b>Clearly stated study objective?</b> | <b>Was the exposure validated against a control population?</b> | <b>Was there an oral examination?</b>                   |
|---------------------------------|---------------------------|----------------------------------------|-----------------------------------------------------------------|---------------------------------------------------------|
| Andrade et al.[7]<br>2013       | Epidemiologic survey      | Yes                                    | No                                                              | Yes                                                     |
| Azodo et al.[8]<br>2011         | Self-reporting            | Yes                                    | No                                                              | No                                                      |
| Beis et al.[9]<br>2001          | Injury or treatment audit | Yes                                    | No                                                              | No – but all injuries confirmed by tournament physician |
| Bolhuis et al.[10]<br>1987      | Self-reporting            | No                                     | No                                                              | No                                                      |
| Bryant et al.[11]<br>2011       | Epidemiologic survey      | Yes                                    | No                                                              | Yes                                                     |
| Chapman and Nasser[12]<br>1993  | Self-reporting            | Yes                                    | No                                                              | No                                                      |
| Davies et al.[13]<br>1977       | Self-reporting            | Yes                                    | No                                                              | No                                                      |
| De Cardenas et al.[14]<br>1977  | Epidemiologic survey      | Yes                                    | No                                                              | Yes                                                     |
| De Sant'Anna et al.[15]<br>2004 | Epidemiologic survey      | Yes                                    | No                                                              | Yes                                                     |

|                               |                                     |         |     |                                                         |
|-------------------------------|-------------------------------------|---------|-----|---------------------------------------------------------|
| Deitch et al.[16]<br>2006     | Injury or treatment audit           | Yes     | No  | No                                                      |
| Dorney[17]<br>1999            | Injury or treatment audit (unclear) | Unclear | Yes | No                                                      |
| Faye et al.[18]<br>2008       | Self-reporting                      | Yes     | No  | No                                                      |
| Forrest[19]<br>1969           | Epidemiologic survey                | Yes     | No  | Yes                                                     |
| Frontera et al.[20]<br>2011   | Self-reporting                      | Yes     | No  | No.                                                     |
| Gay-Escoda et al.[21]<br>2011 | Epidemiologic survey                | Yes     | No  | Yes                                                     |
| Kay et al.[22]<br>1990        | Self-reporting                      | Yes     | No  | No                                                      |
| Kuzuhara et al.[23]<br>2009   | Injury or treatment audit           | Yes     | No  | No – but all injuries confirmed by tournament physician |
| Lundell[24]<br>1997           | Epidemiologic survey                | No      | No  | Yes                                                     |
| Ma[25]<br>2008                | Self-reporting                      | Yes     | Yes | No                                                      |
| McLatchie[26]<br>1976         | Injury or treatment audit           | No      | No  | No – but all injuries confirmed by tournament physician |
| Milosevic et al.[27]          | Epidemiologic survey                | Yes     | No  | Yes                                                     |

|                                      |                                                      |     |     |                                                         |
|--------------------------------------|------------------------------------------------------|-----|-----|---------------------------------------------------------|
| 1997                                 |                                                      |     |     |                                                         |
| Muller-Bolla et al.[28]<br>2003      | Self-reporting                                       | Yes | No  | No                                                      |
| Needleman et al.[1]<br>2013          | Epidemiological survey and injury or treatment audit | Yes | No  | Yes                                                     |
| Persson and Kiliaridis[29]<br>1994   | Epidemiologic survey                                 | Yes | Yes | Yes                                                     |
| Pettersson and Lorentzon[30]<br>1993 | Injury or treatment audit                            | Yes | No  | No – but all injuries confirmed by tournament physician |
| Randell[31]<br>1988                  | Epidemiologic survey                                 | Yes | No  | Yes                                                     |
| Sane et al.[32]<br>1987              | Injury or treatment audit                            | Yes | No  | No                                                      |
| Sharma et al.[33]<br>2012            | Injury or treatment audit                            | No  | No  | Yes                                                     |
| Soler Badia et al.[34]<br>1994       | Injury or treatment audit and self-reporting         | Yes | No  | Yes                                                     |
| Stokes and Chapman[35]<br>1991       | Self-reporting                                       | Yes | No  | No.                                                     |
| Stuart et al.[36]<br>2002            | Epidemiologic survey                                 | Yes | No  | No – but all injuries confirmed by team trainer         |
| Szekely[37]                          | Epidemiologic                                        | Yes | No  | Yes                                                     |



|                                  |                           |     |    |      |
|----------------------------------|---------------------------|-----|----|------|
| 1996                             | survey                    |     |    |      |
| Vouglouklakis et al.[38]<br>2008 | Injury or treatment audit | Yes | No | Yes. |
| Yang et al.[39]<br>2011          | Injury or treatment audit | Yes | No | Yes  |
